# Supplementary material for: A solar-powered interfacial evaporation system based on MoS2-decorated magnetic phase-change microcapsules for sustainable seawater desalination
Source: Royal Society of Chemistry journal article supplement (doi:10.1039/d2ta07353f), 2022-01-01
Supplement: d2ta07353f1.pdf [file d2ta07353f1.pdf]

## Electronic Supplementary Information

### **Solar-powered interfacial evaporation system based on MoS<sub>2</sub>-decorated magnetic phase-change microcapsules for sustainable seawater desalination**

Haohai Shen, Zhiheng Zheng, Huan Liu\*, Xiaodong Wang\*

*State Key Laboratory of Organic–Inorganic Composites, Beijing University of Chemical Technology,  
Beijing 100029, China.*

\* Corresponding authors.

*E-mail address:* [bucthuan@163.com](mailto:bucthuan@163.com) (H. Liu), [wangxdf@aliyun.com](mailto:wangxdf@aliyun.com) (X. Wang);

## Summary of Content

**Section S1.** Preparation of Fe<sub>3</sub>O<sub>4</sub> nanoparticles.

**Section S2.** Characterizations and measurements.

**Fig. S1.** Schematic stripping process of MoS<sub>2</sub> nanosheets.

**Fig. S2.** SEM images of (a) MoS<sub>2</sub> powders and (b) MoS<sub>2</sub> multilayered nanosheets.

**Fig. S3.** Plots of particle-size distributions of (a) Fe<sub>3</sub>O<sub>4</sub>/SiO<sub>2</sub>-MEPCM and (b) MoS<sub>2</sub>-MEPCM.

**Fig. S4.** High-resolution core-level XPS spectra of Fe<sub>3</sub>O<sub>4</sub>/SiO<sub>2</sub>-MEPCM.

**Fig. S5.** EDX pattern and elemental mapping images of Fe<sub>3</sub>O<sub>4</sub>/SiO<sub>2</sub>-MEPCM.

**Fig. S6.** Mass change of MoS<sub>2</sub>-MEPCM in the water body at 50 °C.

**Fig. S7.** Water mass changes of MoS<sub>2</sub>-MEPCM evaporator during the cyclic washing process.

**Fig. S8.** UV-Vis-NIR absorption spectra of MoS<sub>2</sub>-MEPCM after washing ten times.

**Fig. S9.** DSC thermograms of the MoS<sub>2</sub>-MEPCM obtained after every washing process.

**Fig. S10.** Phase-change parameters of MoS<sub>2</sub>-MEPCM obtained after every washing process.

**Fig. S11.** FTIR spectra of MoS<sub>2</sub>-MEPCM before and after the recycling experiment.

**Fig. S12.** XRD patterns of MoS<sub>2</sub>-MEPCM before and after the recycling experiment.

**Fig. S13.** Water evaporation production of MoS<sub>2</sub>-MEPCM-based evaporator during 15 days of natural sunlight illumination.

**Fig. S14.** Evaporation rate of MoS<sub>2</sub>-MEPCM-based evaporator during 15 days of natural sunlight illumination.

**Table S1.** Detection results of water quality for purified water.

## Section S1. Preparation of Fe<sub>3</sub>O<sub>4</sub> nanoparticles.

The synthetic process of Fe<sub>3</sub>O<sub>4</sub> nanoparticles was prepared as follows: FeCl<sub>2</sub>·4H<sub>2</sub>O (0.078 mol L<sup>-1</sup>, 50.0 mL) and FeCl<sub>3</sub>·6H<sub>2</sub>O (0.046 mol L<sup>-1</sup>, 50.0 mL) solutions were mixed in a three-necked round bottom flask (250 mL) with stirring under a nitrogen atmosphere at 25 °C for 30 min. NH<sub>3</sub>·H<sub>2</sub>O (4.0 mL, 25 wt%) was added in the flask with continuous stirring at 25 °C for 1 h. With the reaction completed, the Fe<sub>3</sub>O<sub>4</sub> nanoparticles were separated from the resultant mixture solution by a magnet, washed with deionized water and formamide for three times, and dispersed in formamide (100 mL).

## Section S2. Characterizations and Measurements.

The morphology of MoS<sub>2</sub> nanosheets and phase-change microcapsules was characterized by a field emission scanning electron microscope (SEM, SU8020, Hitachi, Japan) with an acceleration voltage of 15 kV. The SEM equipped with an energy-dispersive X-ray (EDX) spectrometer (INCAX-Act, Oxford, UK) was employed to analyze the surface elemental composition and mapping images of phase-change microcapsules. The microstructure of MoS<sub>2</sub> nanosheets and phase-change microcapsules was observed by a field emission transmission electron microscope (TEM, JEM-2100F, JEOL, Japan) operated with an accelerating voltage of 200 kV, and the selected area electron diffraction (SAED) of MoS<sub>2</sub> nanosheets was characterized by the same instrument. The *Fourier*-transform infrared (FTIR) spectra of pure *n*-docosane and phase-change microcapsules were determined by an infrared spectrometer (Nicolet iS5, Thermo Scientific, USA). The X-ray diffraction (XRD) pattern was characterized by X-ray diffractometer (D/max 2500, Rigaku, Japan) at 40 mA and 40 kV with Cu K $\alpha$  radiation ( $\lambda = 1.5418 \text{ \AA}$ ) and a scan speed of 10° min<sup>-1</sup>. The X-ray photoelectron spectroscopy (XPS) analysis of phase-change microcapsules was carried out through X-ray photoelectron spectrometer (ESCALAB 250Xi, Thermo Scientific, USA) equipped with a focused monochromatized Al K $\alpha$  radiation source. The shape stability of pure *n*-docosane and phase-change microcapsules was characterized by heating on a high-precision electronic hot plate at 120

°C. The appearances of the samples were monitored by a digital camera. Thermal analysis was performed to evaluate the phase-change behavior of pure *n*-docosane and phase-change microcapsules by a differential scanning calorimeter (DSC, Q20, TA Instruments, USA) under a ramp rate of 10 °C min<sup>-1</sup>. Phase-change temperatures, including melting temperature ( $T_m$ , °C), crystallization temperature ( $T_c$ , °C), and rotator phase-transition temperature ( $T_R$ , °C) were directly obtained from the DSC thermograms. Phase-change enthalpies, including melting enthalpy ( $\Delta H_m$ , J g<sup>-1</sup>) and crystallization enthalpy ( $\Delta H_c$ , J g<sup>-1</sup>) were obtained by integrating the endothermic and exothermic peaks in the DSC thermograms. The encapsulation parameters were determined by the phase-change enthalpies based on the following equations.

$$E_{\text{en}} (\%) = \frac{\Delta H_{\text{m, microcapsules}}}{\Delta H_{\text{m, docosane}}} \times 100\% \quad (1)$$

$$E_{\text{es}} (\%) = \frac{\Delta H_{\text{m, microcapsules}} + \Delta H_{\text{c, microcapsules}}}{\Delta H_{\text{m, docosane}} + \Delta H_{\text{c, docosane}}} \times 100\% \quad (2)$$

$$C_{\text{es}} (\%) = \frac{(\Delta H_{\text{m, microcapsules}} + \Delta H_{\text{c, microcapsules}}) \cdot \Delta H_{\text{m, docosane}}}{(\Delta H_{\text{m, docosane}} + \Delta H_{\text{c, docosane}}) \cdot \Delta H_{\text{m, microcapsules}}} \times 100\% \quad (3)$$

where  $E_{\text{en}}$  (%) is the encapsulation ratio,  $E_{\text{es}}$  (%) is the energy-storage efficiency,  $C_{\text{es}}$  (%) is the energy-storage capability,  $\Delta H_{\text{m, docosane}}$  (J g<sup>-1</sup>) and  $\Delta H_{\text{c, docosane}}$  (J g<sup>-1</sup>) are the melting enthalpy and crystallization enthalpy of pure *n*-docosane, respectively, and  $\Delta H_{\text{m, microcapsules}}$  (J g<sup>-1</sup>) and  $\Delta H_{\text{c, microcapsules}}$  (J g<sup>-1</sup>) are the melting and crystallization enthalpies of phase-change microcapsules, respectively. The thermal conductivity was characterized by a thermal conductivity tester (HS-DR-5, HESHENG, China) with an accuracy of  $\pm 3\%$ . The dynamic water contact angle was measured by a water angle measuring instrument (JY-82C, Dingsheng, China) with a water droplet volume of 16  $\mu\text{L}$ . The absorption spectra of phase-change microcapsules were characterized by an UV-Vis-NIR spectrophotometer (UV-3600Plus, Shimadzu, Japan) with a test range of 220–2,500 nm. The photothermal conversion performance was evaluated by a Xenon arc lamp as a light source (Irradiation intensity: 1000 W m<sup>-2</sup>). The temperature evolution during the photothermal conversion process was determined by a *k*-type thermocouple.

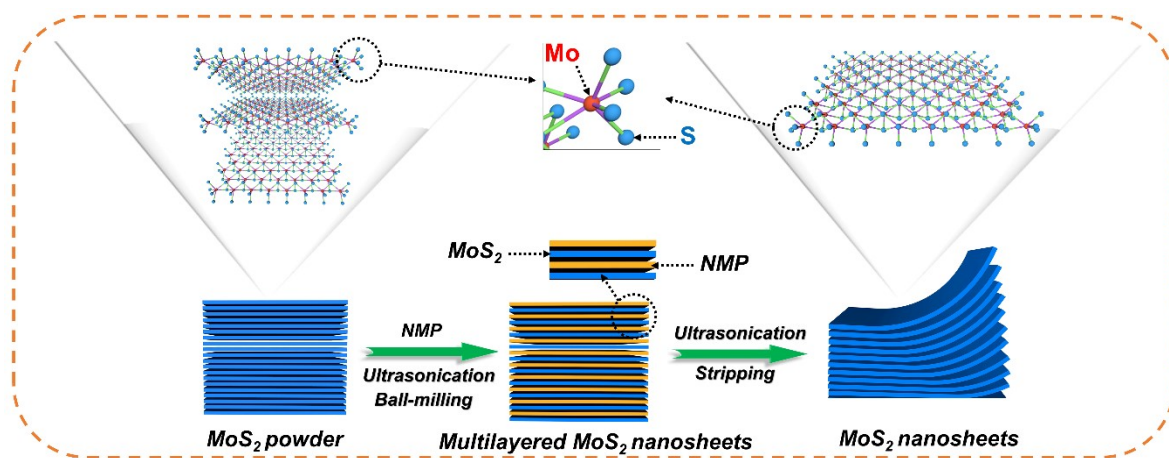

Fig. S1. Schematic stripping process of MoS<sub>2</sub> nanosheets.

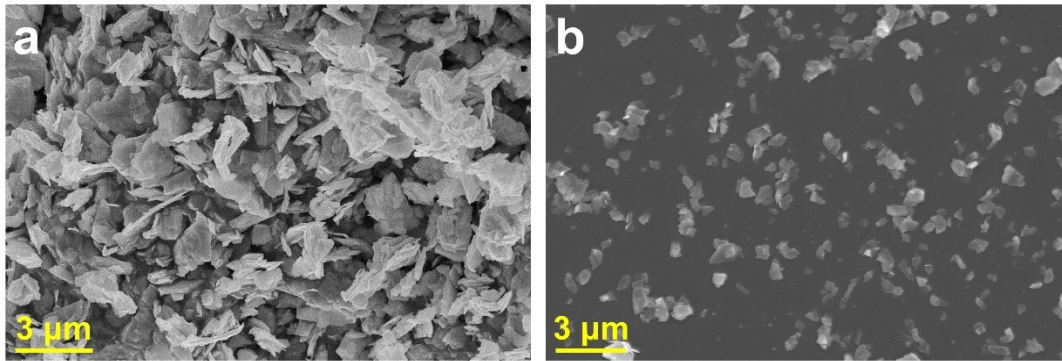

**Fig. S2.** SEM images of (a) MoS<sub>2</sub> powders and (b) MoS<sub>2</sub> multilayered nanosheets.

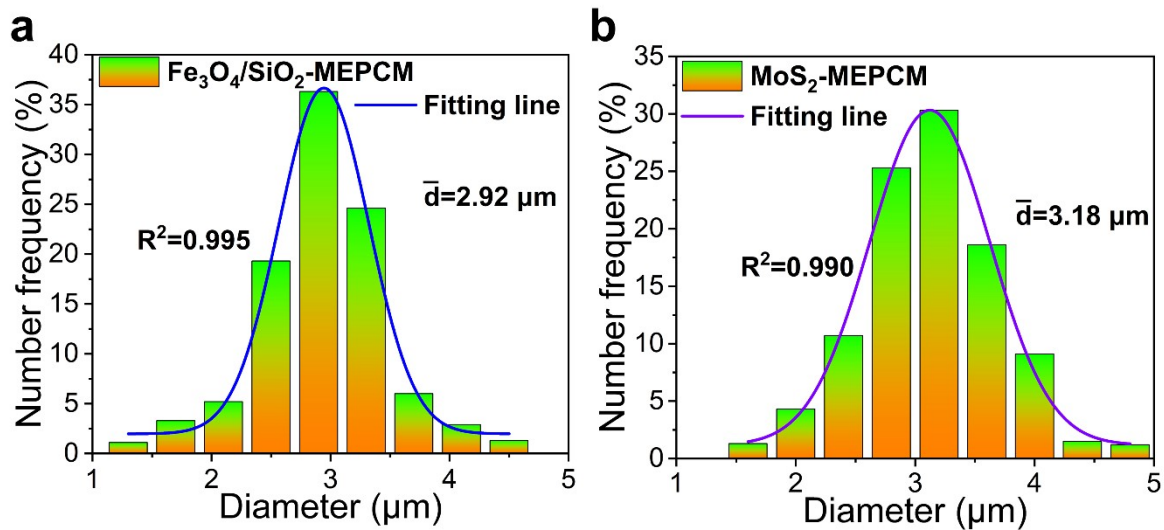

**Fig. S3.** Plots of particle-size distribution of (a) Fe<sub>3</sub>O<sub>4</sub>/SiO<sub>2</sub>-MEPCM and (b) MoS<sub>2</sub>-MEPCM.

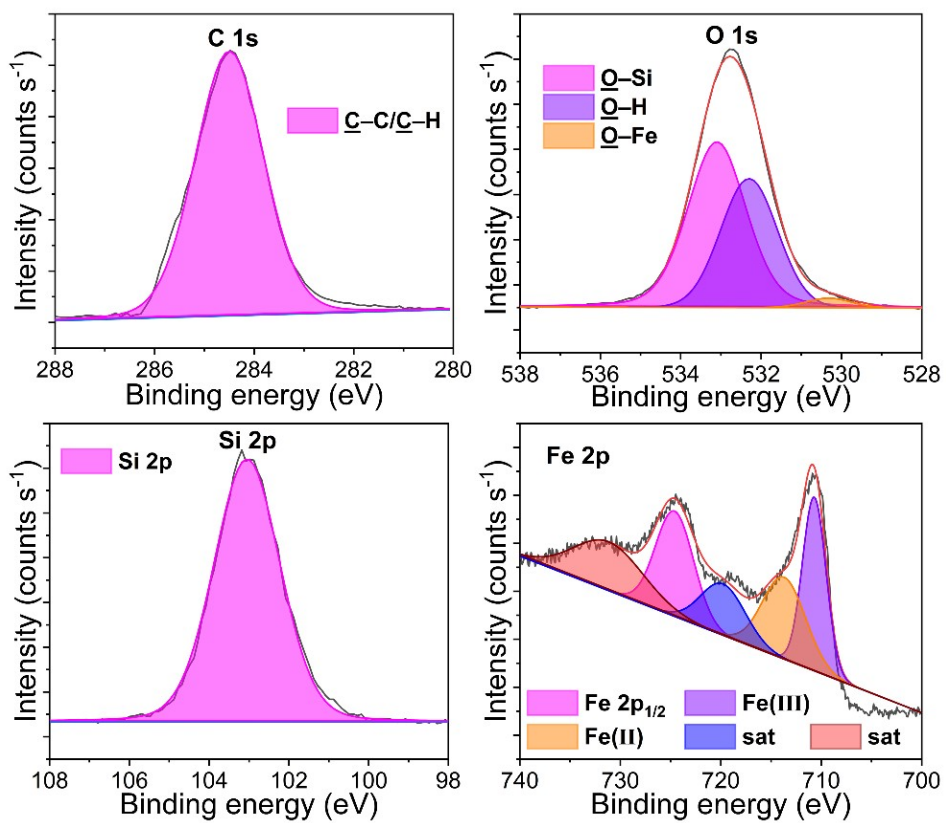

**Fig. S4.** High-resolution core-level XPS spectra of Fe<sub>3</sub>O<sub>4</sub>/SiO<sub>2</sub>-MEPCM.



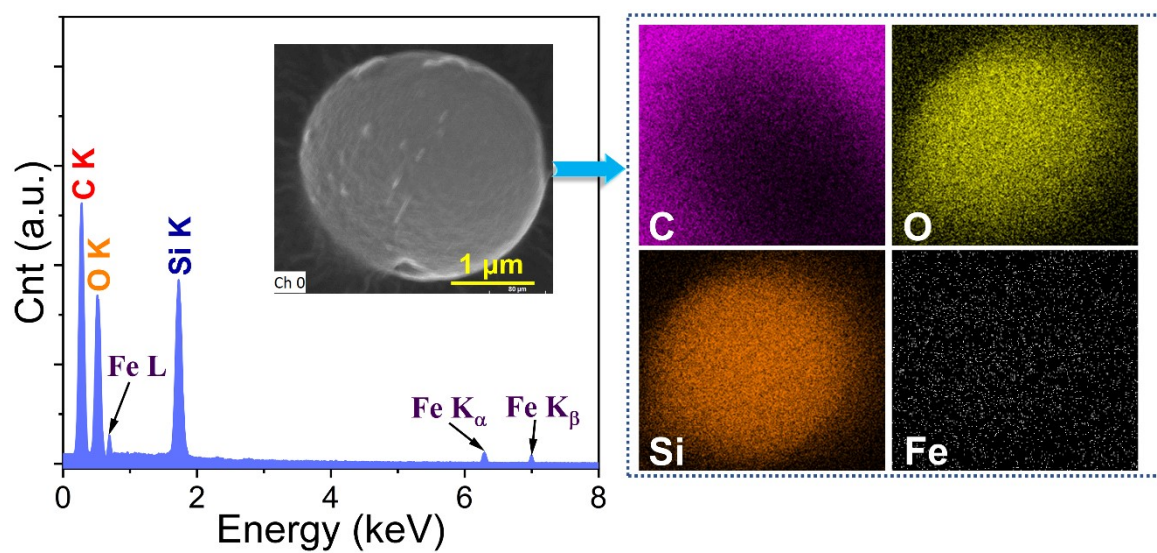

**Fig. S5.** EDX pattern and elemental mapping images of Fe<sub>3</sub>O<sub>4</sub>/SiO<sub>2</sub>-MEPCM.

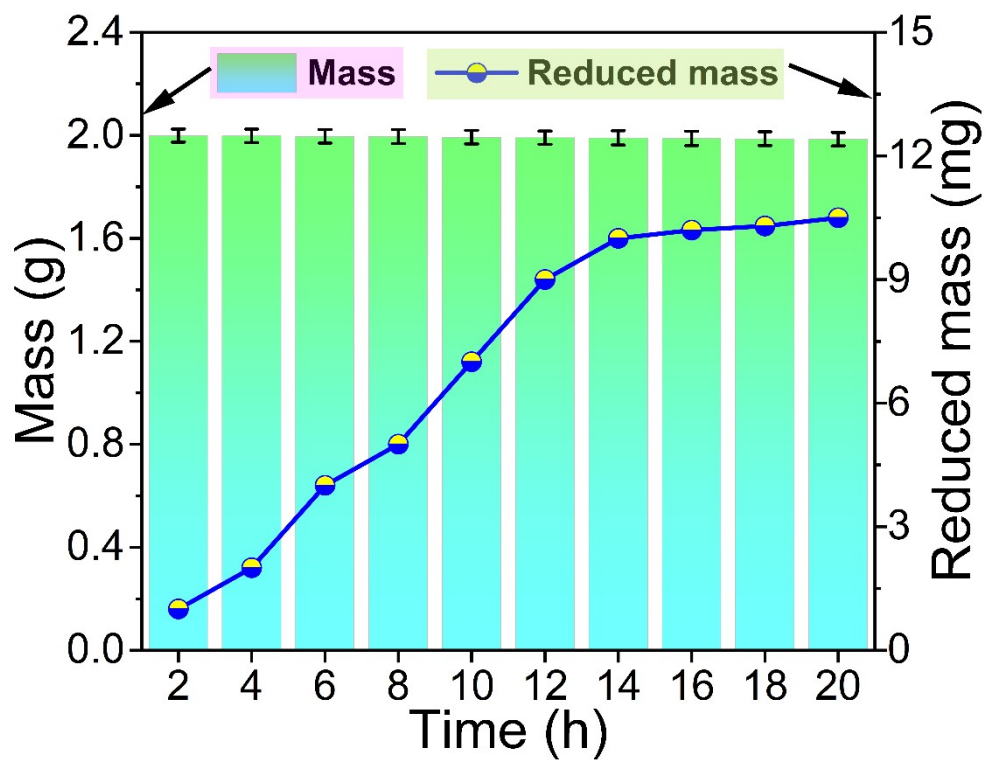

**Fig. S6.** Mass change of MoS<sub>2</sub>-MEPCM in the water body at 50 °C.

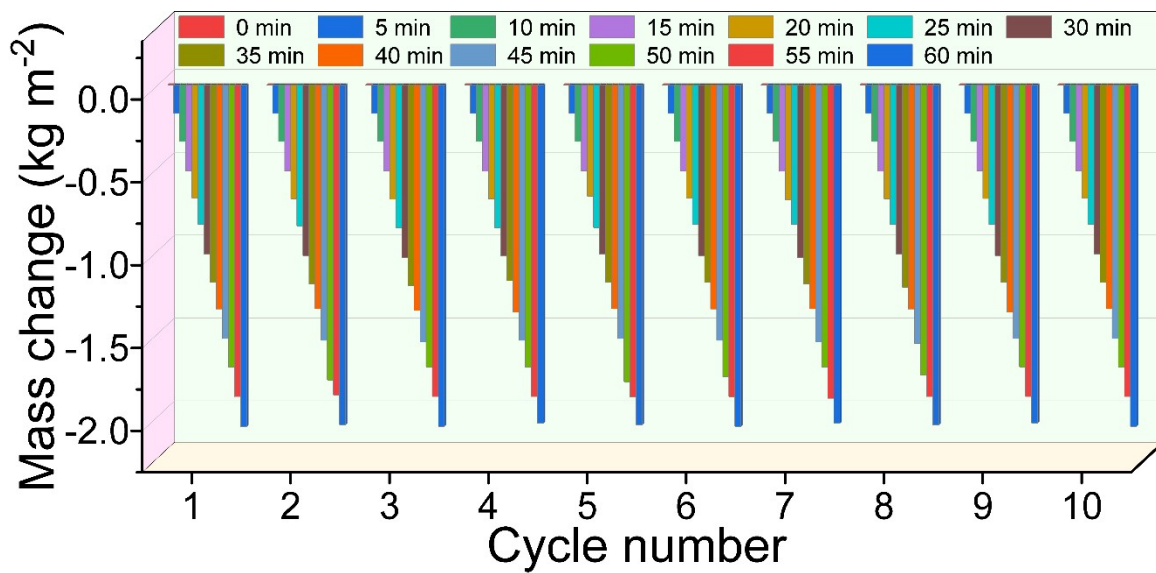

Fig. S7. Mass change of MoS<sub>2</sub>-MEPCM evaporator during the cyclic washing process.

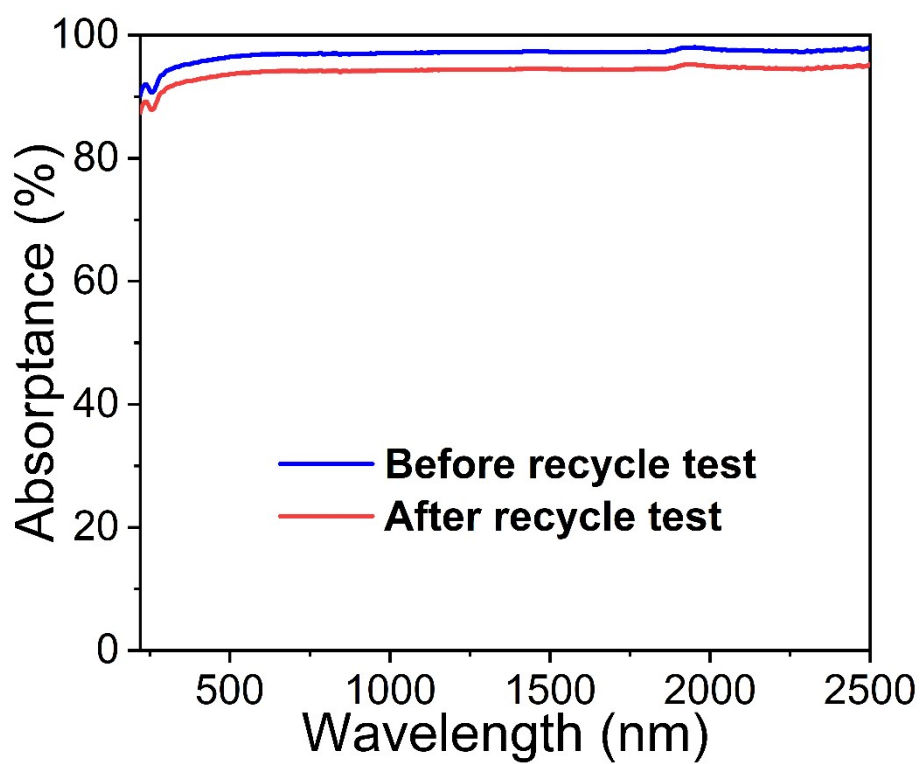

**Fig. S8.** UV-Vis-NIR absorption spectra of MoS<sub>2</sub>-MEPCM before and after the recycling experiment.

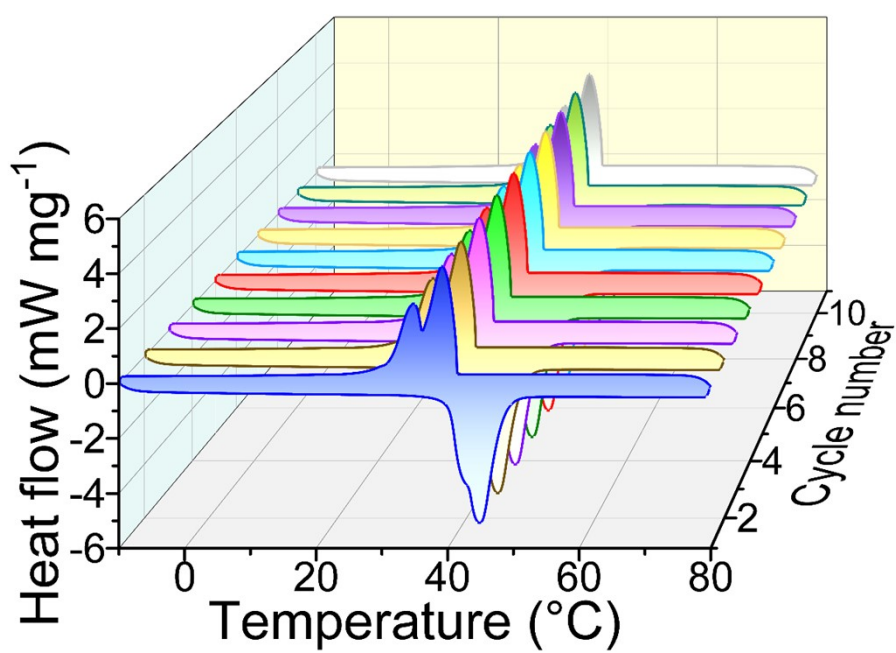

Fig. S9. DSC thermograms of the MoS<sub>2</sub>-MEPCM obtained after every washing process.

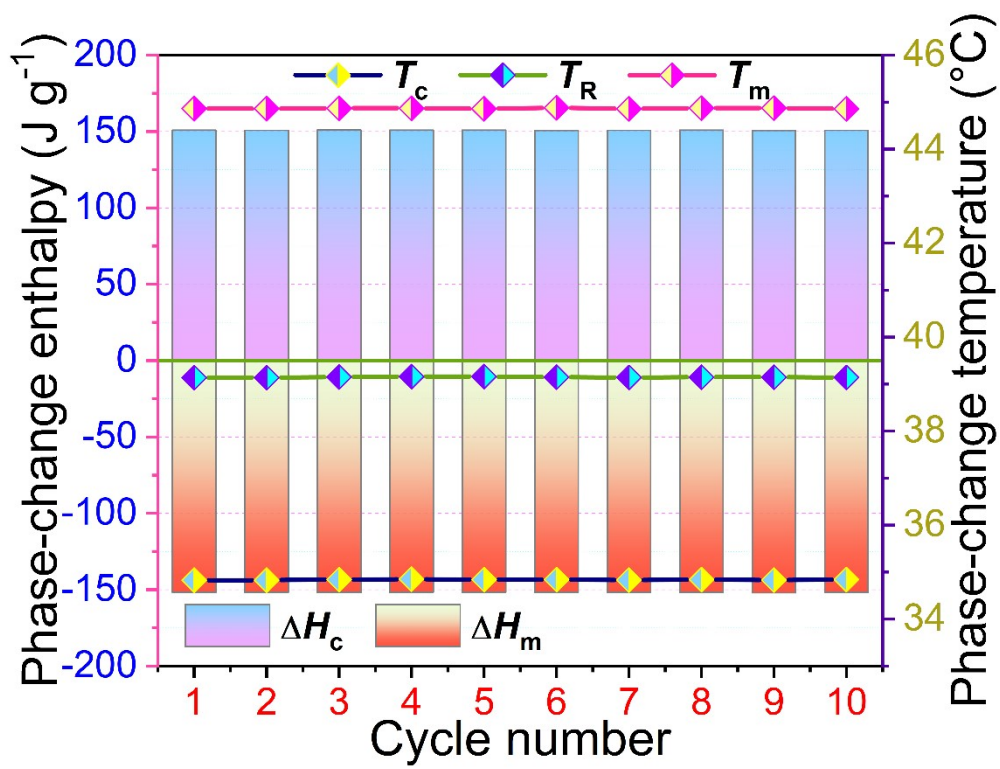

Fig. S10. Phase-change parameters of MoS<sub>2</sub>-MEPCM obtained after every washing process.

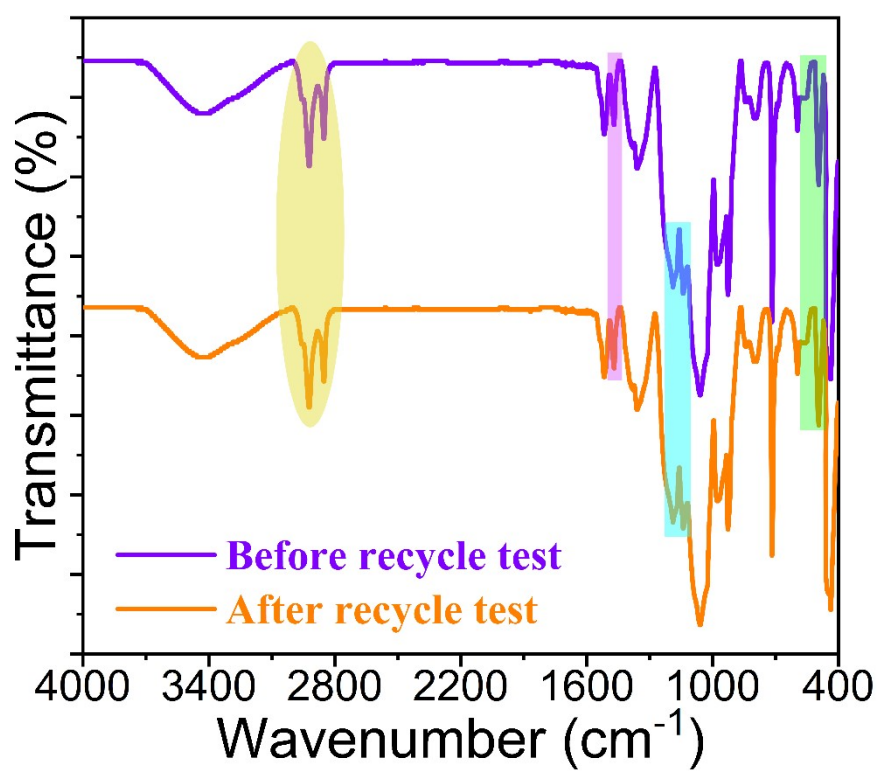

Fig. S11. FTIR spectra of MoS<sub>2</sub>-MEPCM before and after the recycling experiment.

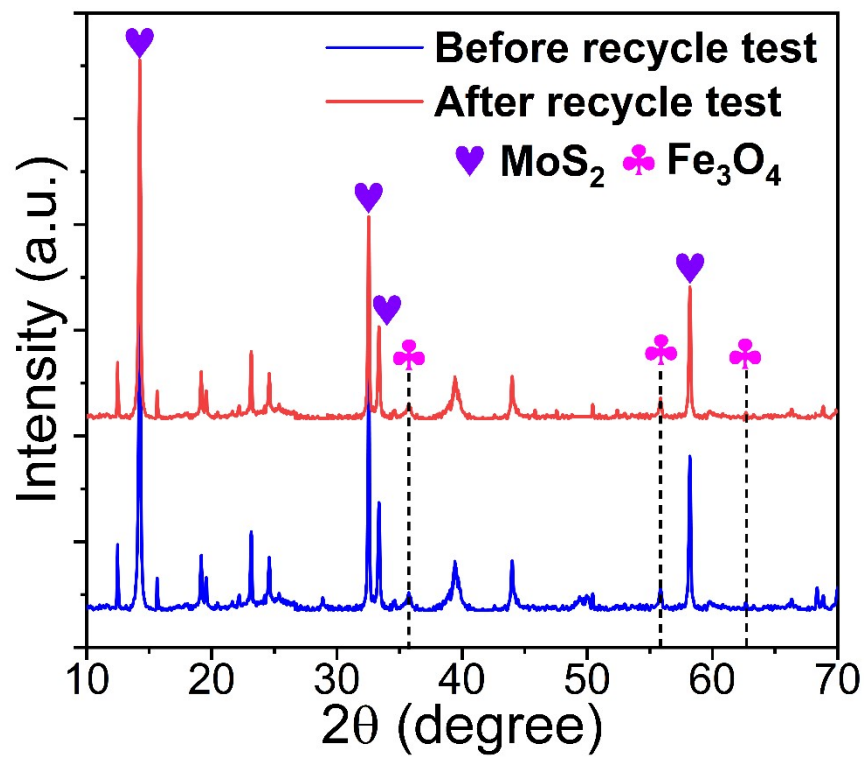

**Fig. S12.** XRD patterns of MoS<sub>2</sub>-MEPCM before and after the recycling experiment.



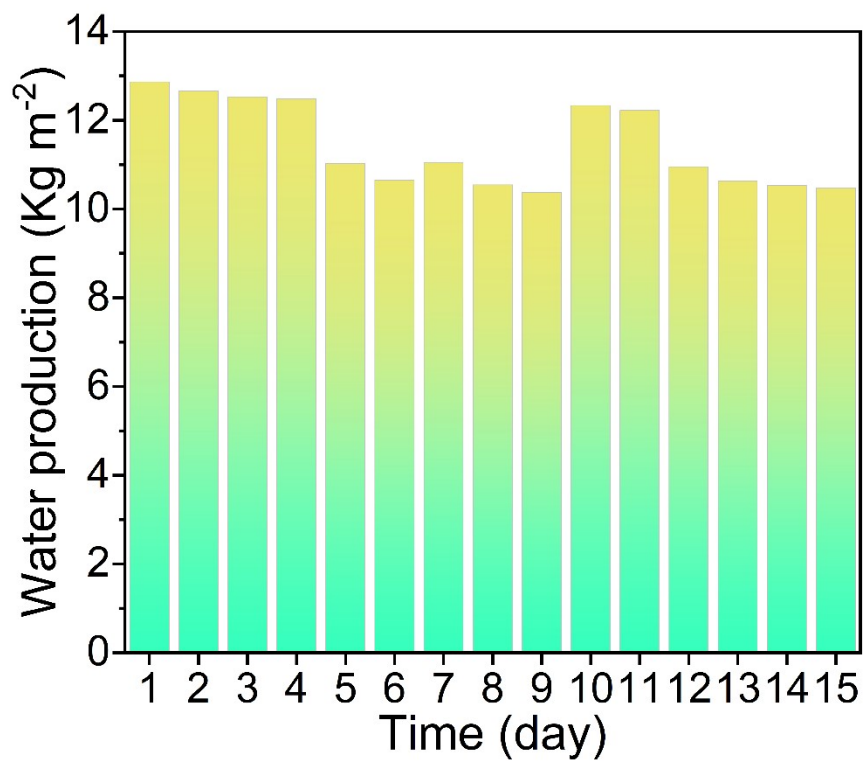

**Fig. S13.** Water evaporation production of MoS<sub>2</sub>-MEPCM-based evaporator during 15 days of natural sunlight illumination.

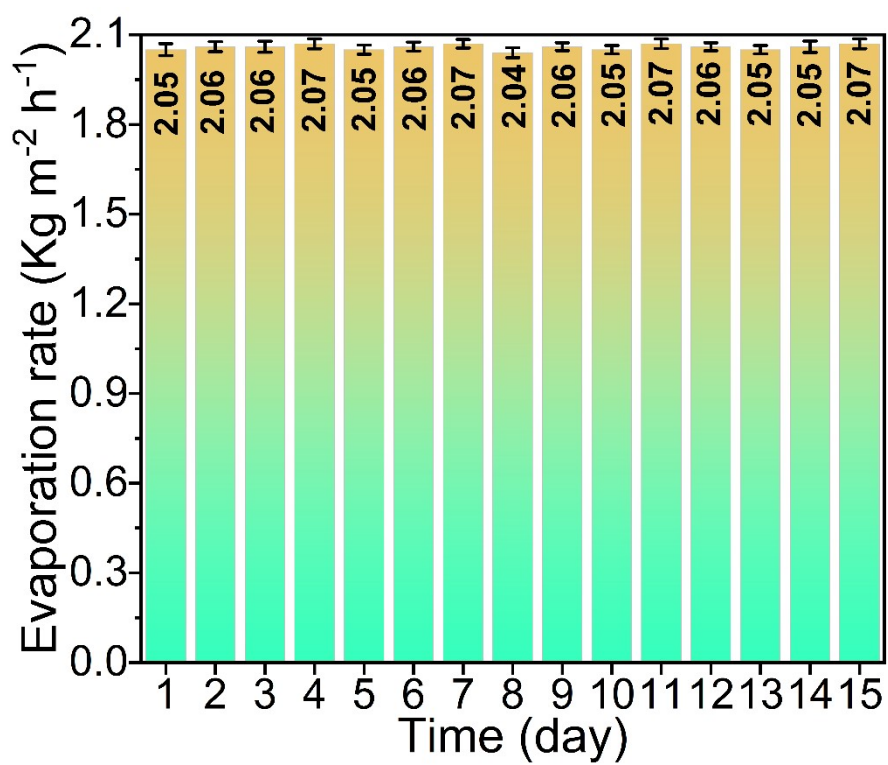

**Fig. S14.** Evaporation rate of MoS<sub>2</sub>-MEPCM-based evaporator during 15 days of natural sunlight

illumination.

**Table S1. Detection results of water quality for purified water**

| <b>Detection item</b>                           | <b>Numerical value</b> |
|-------------------------------------------------|------------------------|
| Anion synthetic detergent (mg L <sup>-1</sup> ) | < 0.1                  |
| Volatile organic compound (mg L <sup>-1</sup> ) | < 0.002                |
| Coliform colony (L <sup>-1</sup> )              | Not detected           |
| pH value                                        | 6.95                   |
